# Supplementary material for: Uncovering superior alleles and genetic loci for yield-related traits in mungbean (Vigna radiata L. Wilczek) through a genome-wide association study
Source: BMC Plant Biol. 2026 May 19;26:1174. doi: 10.1186/s12870-026-08973-1 (PMC13352907; doi:10.1186/s12870-026-08973-1)
Supplement: Supplementary file 1 — Supplementary Material 1. [file 12870_2026_8973_MOESM1_ESM.xlsx]

## Sheet: Supplementary Table S1
Supplementary Table S1: List of 206 mini core genotypes with geographical region of origin and BLUPs derived from multi-year analysis of six traits.
AFR: Africa, EA: East Asia, EUR: Europe, MA: Central America, OP: Oceania and the Pacific, SA: South Asia, SAM: South America, SEA: Southeast Asia, SWA: Southwest Asia, UK: unknown, NA: North America.
Serial No.	Entry No.	Entry Name	Geographical region of origin	Time to 50% flowering (Days)	Time to maturity (Days)	Plant height (cm)	Pods/plant	100 seeds weight (g)	Seed Yield (g/plot)
1	G1	VI000020AY	SEA	49.3079	66.9716	69.9767	38.3208	4.39257	104.777
2	G3	VI000105BG	SA	41.1289	64.9033	64.7423	38.4569	3.88864	115.681
3	G5	VI000170B-BR	SWA	46.0603	67.9564	67.9819	38.8924	3.40147	82.8192
4	G6	VI000175BY	SA	42.2114	62.0472	61.5916	39.0853	3.88864	98.7615
5	G10	VI000232AG	SWA	42.2114	64.6079	67.262	38.349	4.36324	94.9263
6	G14	VI000317BG	SA	45.0981	65.6912	71.8515	39.6018	3.71368	103.424
7	G15	VI000319AG	SA	49.0673	67.9514	70.9616	41.5348	3.68015	95.6783
8	G16	VI000380AG	SEA	42.8034	64.9887	70.7356	38.8737	4.919	107.063
9	G17	VI000461BG	SEA	45.9401	69.4338	78.0408	38.5357	3.78387	125.232
10	G18	VI000470AG	SA	41.8506	64.3124	66.7221	38.3283	4.5602	87.3312
11	G19	VI000532BG	SA	46.9023	67.464	69.0618	39.2201	3.42138	124.781
12	G22	VI000551AG	SA	48.2254	69.3353	71.3815	37.8492	3.42662	88.9856
13	G23	VI000554AG	SA	48.4659	68.5474	73.5613	40.4646	3.35223	131.248
14	G24	VI000559AG	SA	48.2254	70.7141	78.2408	37.4738	3.16994	121.301
15	G25	VI000578AG	SA	48.9471	68.6796	75.4011	40.8773	3.94941	96.2799
16	G26	VI000589B-BR	SA	43.8953	67.0701	65.7422	38.8883	3.78523	107.183
17	G27	VI000616BG	SAM	47.5151	66.0913	63.8252	36.5544	3.81723	75.5019
18	G28	VI000618AG	SA	40.4072	63.9184	58.003	40.73	4.46172	94.5503
19	G29	VI000625B-BR	SA	45.0983	67.9466	66.9147	38.3976	3.84797	88.941
20	G30	VI000680AG	NA	45.8198	65.9867	60.6827	38.4818	3.82368	85.3008
21	G31	VI000723AG	SWA	43.0533	65.7897	65.7422	39.357	3.80273	101.318
22	G33	VI000735BG	SA	44.8575	67.1685	68.8318	38.5295	3.87083	100.19
23	G34	VI000736AG	SA	47.9848	67.794	64.1351	39.3402	4.29226	77.1477
24	G35	VI000749AG	SA	46.2565	65.6531	70.1347	37.0984	3.43395	73.8705
25	G36	VI000764AG	SA	45.9401	67.3655	64.7823	41.4393	4.09071	97.7736
26	G37	VI000766BG	SA	43.2939	66.0852	71.7215	38.7804	3.64034	113.726
27	G38	VI0007953AG	SA	45.5792	66.4791	73.7813	38.5689	3.78387	107.772
28	G39	VI000805BG	SA	43.2939	66.4791	67.122	40.3401	4.43238	127.488
29	G40	VI000815BG	SA	38.9638	63.229	57.923	38.8676	3.75873	129.819
30	G41	VI000818BG	SA	42.3317	64.0169	65.6422	40.3733	3.49576	140.272
31	G42	VI000852AG	SA	44.0156	64.8048	72.6014	38.5979	4.16627	117.561
32	G43	VI000938AG	SA	48.7065	69.3353	74.9211	39.0169	3.22022	136.587
33	G44	VI000942AG	SA	48.5862	67.858	73.2613	39.1911	4.03846	130.496
34	G45	VI000981BG	SEA	42.9331	68.7443	68.7418	36.7977	4.13799	84.0736
35	G46	VI001023BG	SA	42.2114	64.8048	62.4425	38.4776	4.14218	106.958
36	G49	VI001124AG	OP	43.775	64.4109	64.8823	38.9698	4.33495	93.3472
37	G52	VI001191BG	SEA	45.8198	66.1837	65.6022	40.1653	3.88379	71.808
38	G54	VI001221AG	SEA	42.9331	65.6873	66.6271	37.7486	4.14519	81.2989
39	G56	VI001268BG	SA	40.5275	65.2185	64.1223	39.1496	3.92321	139.032
40	G57	VI001282AG	SA	46.2973	66.2944	74.5499	39.3677	3.58961	97.3637
41	G58	VI001284AG	SA	43.2325	66.4006	69.7084	38.4736	3.76174	121.378
42	G59	VI001339AG	SEA	45.9401	66.5776	74.2212	38.237	4.96355	100.867
43	G60	VI001385AG	SA	45.9921	68.8405	69.7706	38.2172	4.32723	87.5767
44	G61	VI001400AG	SA	43.361	65.658	69.791	38.6341	4.14792	111.889
45	G63	VI001406BG	SA	49.0673	69.0398	74.3812	38.6145	3.69757	109.973
46	G64	VI001408BG	SA	49.789	69.2368	73.5413	39.8838	3.13012	92.52
47	G65	VI001411AG	SA	49.3079	68.0549	80.9405	37.8181	3.41545	109.205
48	G66	VI001412AG	SA	47.1429	67.1685	78.6407	40.1825	3.7032	105.454
49	G67	VI001419BG	SA	45.8279	68.8428	77.8608	39.1372	4.12437	125.006
50	G68	VI00141AG	SA	46.9023	67.3137	68.4939	39.2584	3.48958	106.347
51	G70	VI001435AG	NA	47.7389	66.5935	67.694	38.3371	3.84637	111.828
52	G71	VI001482BG	SA	46.0603	68.1534	77.1609	38.1831	3.44757	119.592
53	G72	VI001490AG	SWA	43.1736	64.4109	66.3821	39.7013	3.55548	123.953
54	G73	VI001509AG	SA	44.4967	66.8731	64.3723	38.4113	3.81074	92.8683
55	G77	VI001535BG	SA	44.7373	66.185	68.2804	37.6855	3.95723	95.4808
56	G78	VI001539AG	SA	50.0296	69.0398	75.4411	38.544	3.1437	95.9421
57	G79	VI001548AG	SA	43.775	67.3655	72.3614	37.7434	3.48738	115.212
58	G81	VI001557BG	NA	45.4589	66.5776	67.222	38.4113	3.40985	125.382
59	G82	VI001562AG	SA	47.4048	68.1081	72.4666	39.2963	3.42774	140.773
60	G83	VI001576BG	SA	48.1051	69.2368	71.9815	38.208	3.19194	117.787
61	G84	VI001579BG	SA	43.2939	65.8882	72.7814	38.5108	3.90436	126.059
62	G85	VI001605BG	SA	43.009	65.619	76.7006	43.9605	3.68133	136.853
63	G88	VI001651BG	SA	49.085	69.7045	72.3715	38.2889	3.2181	84.4366
64	G89	VI001652BG	SA	48.5862	68.6459	73.1013	38.9132	3.55024	86.8048
65	G90	VI001654BG	SA	44.1359	66.6761	65.5622	40.3401	3.64558	118.163
66	G91	VI001678BG	SA	40.8883	65.3958	68.8018	38.2827	3.54605	144.107
67	G92	VI001692AG	SA	45.2184	67.267	75.1211	39.4856	4.0636	147.792
68	G93	VI001698BG	SA	48.7753	68.4729	73.2041	38.7549	3.51104	137.143
69	G95	VI001733BG	SA	43.2325	65.205	67.4325	40.7661	3.71734	132.811
70	G96	VI001743BG	SA	49.3759	68.8856	76.2384	39.2088	3.4077	140.675
71	G98	VI001762A-GM	SA	44.8575	66.4791	73.7213	37.9384	3.61761	97.5765
72	G99	VI001806AG	SA	49.0422	68.0055	64.4423	37.634	3.56147	88.3042
73	G101	VI001820BG	EUR	48.6899	68.3641	67.6809	39.3046	3.93837	86.5309
74	G102	VI001859BG	SEA	43.5345	65.8882	65.1722	39.2637	4.03112	98.5359
75	G103	VI001974BG	EA	41.4665	63.8916	70.7285	39.6186	3.74242	128.047
76	G104	VI001993BG	EA	42.6925	64.6079	61.5226	38.1499	4.08351	115.832
77	G105	VI002009BG	SA	43.775	65.3958	64.1823	38.067	4.00074	123.126
78	G106	VI002012BG	SA	43.4878	65.9783	65.5222	39.0576	3.49277	153.337
79	G107	VI002051BG	SA	47.9848	68.2519	80.3005	42.4297	3.89912	145.16
80	G108	VI002063BG	NA	46.4012	67.7637	71.2928	37.0654	4.04899	91.7251
81	G109	VI002173AG	SA	47.0226	69.4338	69.8217	40.4811	3.40252	101.694
82	G111	VI002176AG	SA	41.7303	63.5245	68.1819	38.768	3.85351	110.984
83	G112	VI002176BG	SA	41.3694	63.229	70.3616	38.7514	3.6571	124.329
84	G113	VI002190BG	SA	47.3834	68.1534	75.781	38.6933	4.12332	119.517
85	G114	VI002195AG	SEA	44.4967	65.5927	65.5422	38.4444	4.60493	102.99
86	G115	VI002197BG	EA	42.393	65.7806	60.1337	40.3727	3.8761	96.2314
87	G116	VI002206AG	SEA	41.7303	64.2139	64.0024	36.611	4.45334	95.7535
88	G120	VI002402BG	SEA	45.4589	67.3655	65.8721	38.6394	3.29356	93.7232
89	G121	VI002432AG	SEA	46.782	67.6019	68.0019	36.3731	6.93737	95.2921
90	G123	VI002455AG	EA	41.8506	64.5094	62.9025	40.1203	4.53296	84.1728
91	G124	VI002469AG	SEA	47.2631	66.8731	71.7215	38.7638	4.48267	88.9104
92	G125	VI002487AG	SA	45.0316	65.6531	76.9903	38.8577	3.87012	142.258
93	G126	VI002523AG	SEA	46.4212	66.3806	72.6414	39.8527	3.95988	102.221
94	G128	VI002532AG	SA	47.3834	66.608	64.7723	38.651	4.12541	84.624
95	G129	VI002537AG	SWA	44.2423	66.5935	63.3976	37.7215	4.08426	79.7787
96	G130	VI002569BG	AFR	47.5037	65.1003	75.981	38.8841	4.27628	151.401
97	G131	VI002587AG	OP	46.2134	66.298	63.4773	39.2109	3.69294	80.6994
98	G133	VI002646AG	SEA	48.8101	68.3332	62.0193	37.1924	4.22473	73.1337
99	G134	VI002647AG	SEA	43.8733	66.9673	66.0323	37.3822	4.55541	97.6574
100	G136	VI002739AG	SWA	45.0981	66.7746	70.7716	36.7313	4.16783	114.696
101	G137	VI002802A-BR	SWA	43.4142	64.5705	64.6423	38.0711	3.4109	76.8033
102	G138	VI002859BG	SWA	44.4823	66.5928	68.6169	38.3972	3.33814	91.6018
103	G140	VI002872BG	SWA	42.8128	65.0018	66.2321	39.5852	4.19456	110.718
104	G141	VI002877BG	SWA	41.61	64.7063	62.8625	40.0083	3.75035	102.371
105	G142	VI002894B-BR	SWA	49.0673	68.3504	67.212	38.32	3.40881	115.381
106	G143	VI002926AG	SA	48.7151	67.5921	73.6588	38.7708	3.88844	110.482
107	G146	VI002993BG	SA	45.1248	64.6714	66.9605	39.6903	3.92187	72.5711
108	G148	VI003019A-BLM	UK	43.7365	65.565	58.2674	39.7599	4.16736	80.0878
109	G152	VI003057BG	SA	48.1051	68.1534	77.0009	38.0711	3.53622	104.754
110	G153	VI003062BG	SA	49.4282	68.8428	75.3011	39.1455	3.40671	109.59
111	G155	VI003070AG	SA	48.2254	69.1383	72.3814	38.9713	3.41614	107.861
112	G157	VI003114AG	SA	46.754	68.423	69.1011	38.9833	3.44574	112.709
113	G159	VI00312B-BLM	SA	49.0673	68.0549	69.2518	37.4157	4.27865	70.9836
114	G160	VI003159AG	SA	44.617	65.8882	68.0219	39.9958	3.77444	97.2575
115	G161	VI003172BG	SA	46.4212	66.4791	72.0815	40.1161	3.69377	107.334
116	G162	VI003181B-GM	SA	44.3764	67.5429	60.0428	37.2788	3.83835	68.6065
117	G163	VI003183AG	SA	45.6227	66.7017	70.2319	37.7545	3.5661	95.4745
118	G164	VI003187BG	SA	42.0911	64.0169	66.1821	37.8305	4.27733	107.033
119	G166	VI003232AG	SA	46.23	67.7988	71.4148	41.8618	3.93359	102.367
120	G167	VI003235AG	SA	39.445	63.3275	64.1423	38.4527	4.31714	117.937
121	G168	VI003242AG	SA	41.3694	64.2139	65.9021	39.6598	4.27418	119.968
122	G169	VI003251A-BL	SA	40.5275	64.6079	57.1431	39.6972	4.11703	133.128
123	G170	VI003251A-BLM	SA	45.3387	66.3806	70.7216	38.5274	3.73673	128.315
124	G171	VI003252BG	SA	42.3317	64.4109	62.1626	39.3695	3.22651	120.569
125	G175	VI003332AG	SA	44.617	66.3806	62.6625	39.7469	3.69796	92.0688
126	G176	VI003337BG	SA	39.445	64.2139	60.7427	38.4279	4.38943	111.32
127	G177	VI003364AG	SA	39.8058	63.426	62.7425	38.1416	4.58011	123.457
128	G178	VI003379BG	SA	48.7065	68.0549	65.5222	38.2744	3.69273	86.5792
129	G179	VI003382BG	SA	46.9023	67.0701	66.1481	40.5019	3.55631	77.1676
130	G180	VI003407AG	SA	46.5653	67.1684	66.9498	36.8916	3.4504	110.856
131	G181	VI003413BG	SA	44.617	67.267	74.4412	38.4984	3.78806	113.125
132	G182	VI003440AG	SA	48.1051	68.4489	73.9412	39.8672	3.60577	105.454
133	G183	VI003455AG	SA	46.1806	66.6761	67.467	38.7726	4.11913	98.0095
134	G185	VI003465BG	SA	49.3079	68.2312	77.0609	37.7974	3.29985	104.251
135	G186	VI003470BG	SA	45.0981	66.3806	71.4815	39.1911	4.20549	93.9074
136	G188	VI003490AG	SA	46.4269	66.4457	66.3629	40.665	3.9036	77.1428
137	G191	VI003517BG	SA	48.2254	68.3504	66.4621	38.1209	3.567	81.24
138	G194	VI003548AG	SA	48.5862	69.5094	70.3816	37.422	3.3066	91.3249
139	G195	VI003554AG	SA	46.5415	68.5868	71.6485	38.5031	3.81216	84.4639
140	G198	VI003577AG	SA	43.6547	66.6761	67.522	39.5727	4.35171	119.517
141	G199	VI003602AG	SA	45.9401	67.5625	73.4213	38.3573	3.75123	81.5408
142	G201	VI003648BG	SA	48.4659	68.4489	74.3012	37.7082	4.01855	84.7744
143	G202	VI003658BG	SA	43.4142	64.8048	76.7709	38.7721	3.81817	103.552
144	G203	VI003664AG	SA	50.3904	68.6459	73.7213	38.6767	3.84299	93.341
145	G205	VI003685AG	SA	47.624	66.6761	77.8208	41.402	3.34385	102.221
146	G209	VI003733BG	SA	45.3228	67.1274	68.0934	38.9435	3.41948	109.018
147	G211	VI003734B-DG	SA	43.6547	66.3806	77.0409	38.7016	3.94626	120.193
148	G215	VI003785BG	SA	42.6925	64.5094	66.4221	39.5022	3.55129	119.742
149	G217	VI003801BG	SA	42.2114	65.1988	66.882	38.9339	4.40095	123.489
150	G219	VI003886B-BR	SA	44.9778	67.464	69.0218	37.366	4.15219	100.864
151	G221	VI003893AG	SA	49.4282	68.3504	68.3719	37.7517	3.479	85.3008
152	G223	VI003907AG	SWA	45.1501	66.6128	64.2429	37.5677	3.34841	71.8809
153	G224	VI003914AG	SA	45.6995	67.3655	67.422	38.5647	3.55862	99.8143
154	G225	VI003925B-BLM	SA	48.9471	68.6459	76.181	39.4234	3.34804	108.763
155	G226	VI003927AG	SA	47.9848	68.8428	81.2004	39.1538	3.1867	144.332
156	G227	VI003929A-BL	SA	41.3694	64.8048	60.1428	38.0587	3.97141	92.7456
157	G228	VI003942AG	SWA	42.5722	64.3124	62.2026	39.4576	3.22756	102.672
158	G229	VI003944B-BR	SWA	47.2631	68.1534	66.1821	39.9398	3.79016	95.5279
159	G230	VI003947B-BR	SA	45.2285	67.0158	63.5951	37.6449	3.8526	87.732
160	G232	VI003951AG	SA	42.3317	64.0169	63.8024	40.0456	4.22809	110.793
161	G234	VI003957AG	SA	44.2561	65.6912	74.5812	38.291	3.47586	117.261
162	G235	VI003958B-BLM	SA	43.775	66.6761	71.4815	37.2498	3.19927	109.139
163	G236	VI003959BG	SA	49.4282	68.9413	71.2415	39.4898	3.62999	93.1183
164	G237	VI004006A-GM	SA	46.1806	66.7746	76.6409	41.1034	3.47586	119.517
165	G238	VI004010AG	SA	42.6925	66.4791	73.4213	39.9834	4.41248	143.43
166	G239	VI004024AG	OP	46.9679	66.608	69.4939	38.5997	3.81983	87.5151
167	G240	VI004044BG	SA	46.0603	67.661	68.6418	38.2287	3.80378	95.8287
168	G241	VI004045A-BGM	SA	45.4589	67.7595	67.122	38.6809	3.76921	88.936
169	G243	VI004069BG	SA	46.4212	66.8731	71.3035	39.1787	4.06577	103.813
170	G244	VI004096AG	SA	50.0951	68.8363	77.6557	39.0285	3.53344	80.5699
171	G245	VI004096BG	SA	48.4659	65.1974	74.0212	37.8285	3.75035	82.2176
172	G247	VI004133BG	SA	45.0981	67.267	57.878	38.9526	3.82412	94.8981
173	G249	VI004184AG	EUR	45.8963	68.5222	65.2045	39.7133	3.68519	76.9072
174	G250	VI004243B-BR	SWA	43.1736	64.1154	65.2022	38.9837	3.66025	106.056
175	G251	VI004244B-BR	SA	48.2254	68.5474	76.461	39.7221	3.15841	90.8656
176	G253	VI004302AG	SWA	44.2561	65.9867	63.4924	38.6187	3.60654	89.849
177	G254	VI004307AG	SWA	44.3764	66.6761	69.2218	39.1247	3.93893	119.592
178	G256	VI004347B-BLM	SA	41.61	64.1154	61.1427	38.4279	3.71577	77.6305
179	G261	VI004639AG	SWA	48.8181	68.2143	66.4754	40.6636	3.81354	88.4231
180	G263	VI004691AG	SWA	47.5037	67.0701	71.7715	38.7452	3.52563	109.958
181	G265	VI004734AG	SA	42.0911	65.3958	68.0919	37.8948	3.42243	93.8736
182	G266	VI004789BG	SWA	46.9023	67.464	69.5277	40.0276	3.58691	101.845
183	G268	VI004810BG	SWA	44.3206	66.8729	63.6941	39.2163	3.67005	101.865
184	G269	VI004811BG	SA	49.0673	68.5474	66.5621	39.9295	3.25165	123.277
185	G270	VI004822BG	SA	47.1429	68.8428	71.4415	41.3937	3.09555	94.6255
186	G271	VI004838AG	SA	44.617	65.4172	65.6952	42.2316	3.58272	96.2799
187	G272	VI004842AG	SA	45.9129	67.5284	68.2942	40.4026	3.55914	82.2717
188	G273	VI004871BG	SA	40.9861	64.2264	68.5495	38.3377	3.83207	123.878
189	G275	VI004877AG	SA	46.3009	66.4791	79.7606	40.5724	3.51881	152.304
190	G276	VI004915BG	SA	40.5275	64.0169	64.1223	39.0832	4.33285	124.029
191	G277	VI004931AG	SA	46.8659	67.6107	69.5079	39.5894	3.73212	105.488
192	G278	VI004933AG	SA	45.9401	66.8731	70.6676	38.4486	3.57958	118.539
193	G279	VI004934AG	SA	46.4212	67.858	65.7822	39.8258	3.55862	111.921
194	G280	VI004942BG	SA	46.6617	67.1685	73.3013	38.7804	4.13903	125.984
195	G282	VI004954BG	SA	39.9261	65.0018	69.3018	39.7179	4.47534	132.902
196	G283	VI004956AG	SA	46.7208	68.4326	74.0734	39.9287	3.91024	98.0469
197	G284	VI004957AG	SA	43.775	66.8731	72.2614	38.6145	3.61729	113.2
198	G285	VI004958BG	SA	43.8953	65.3958	73.2813	37.8845	4.42191	116.133
199	G286	VI004965BG	SA	46.782	67.0701	74.0212	38.9381	3.67282	131.248
200	G287	VI004968AG	SA	46.4212	67.267	76.9009	41.0059	3.65815	116.734
201	G288	VI004969AG	SA	45.4589	65.9867	69.6617	37.1295	3.55671	126.92
202	G289	VI004973B-BLM	SA	48.1841	67.4785	75.7694	39.6981	3.30515	134.206
203	G290	VI005030BY	SA	39.2044	63.82	62.7425	37.8181	4.02744	106.895
204	G293	VI005041AG	SA	43.8501	66.8729	61.571	37.3419	4.39389	125.542
205	G294	VI005066A-GM	MA	47.5037	68.2519	64.7223	41.1531	3.55647	91.0874
206	G295	VI00710AG	UK	42.3317	65.3958	60.6027	39.0169	3.55129	114.027

## Sheet: Supplementary Table S2
Supplementary Table S2: Coverage of SNPs per individual mungbean chromosome after filtering
	Chromosome	Size (Mb)	DArTseq
			Number of SNPs	Distance between SNPs (Kb)
	1	36.1449	493	73.3162
	2	25.1941	321	78.4862
	3	12.7786	273	46.808
	4	20.6308	276	74.7492
	5	36.0357	385	93.5992
	6	37.3141	478	78.063
	7	54.8565	513	106.933
	8	45.1297	610	73.9831
	9	20.9674	353	59.3978
	10	20.7706	273	76.0828
	11	19.0007	332	57.2309
	Total	328.823	4307	-
	Average	29.893	391.545	74.4226

## Sheet: Supplementary Table S3
Supplementary Table 3: Weather data of the three experiments conducted in 2017, 2018, and 2019 at Pulses Research Center, Ishwardi, Pabna, Bangladesh
Month/Year	Temperature		Relative Humidity		Rainfall (M.M.)
	Maximum (˚C)	Minimum (˚C)	0000 U.T.C (%)	1200 U.T.C (%)
2017-03-01	31.2516	18.6806	91.0645	58.6452	12.3871
2017-04-01	34.7267	23.2667	91.8333	60.9	4.61667
2017-05-01	35.0871	25.1323	92.5161	69.4194	21.0419
2018-03-01	32.85	19.85	87.975	48.825	0.51
2018-04-01	31.8	20.875	91.275	71.375	7.06
2018-05-01	31.4	24.55	87.1	73.325	4.7
2019-03-01	32.1871	17.8226	91.871	49.9355	0
2019-04-01	34.1133	22.941	92.7	66.9333	0
2019-05-01	35.6806	25.6774	91.4194	66.6129	40.3548
